# Supplementary material for: Pick’s Tau Fibril Shows Multiple Distinct PET Probe Binding Sites: Insights from Computational Modelling
Source: MDPI journal article supplement (doi:10.3390/ijms22010349), 2020-12-31
Supplement: s1 [file s1]

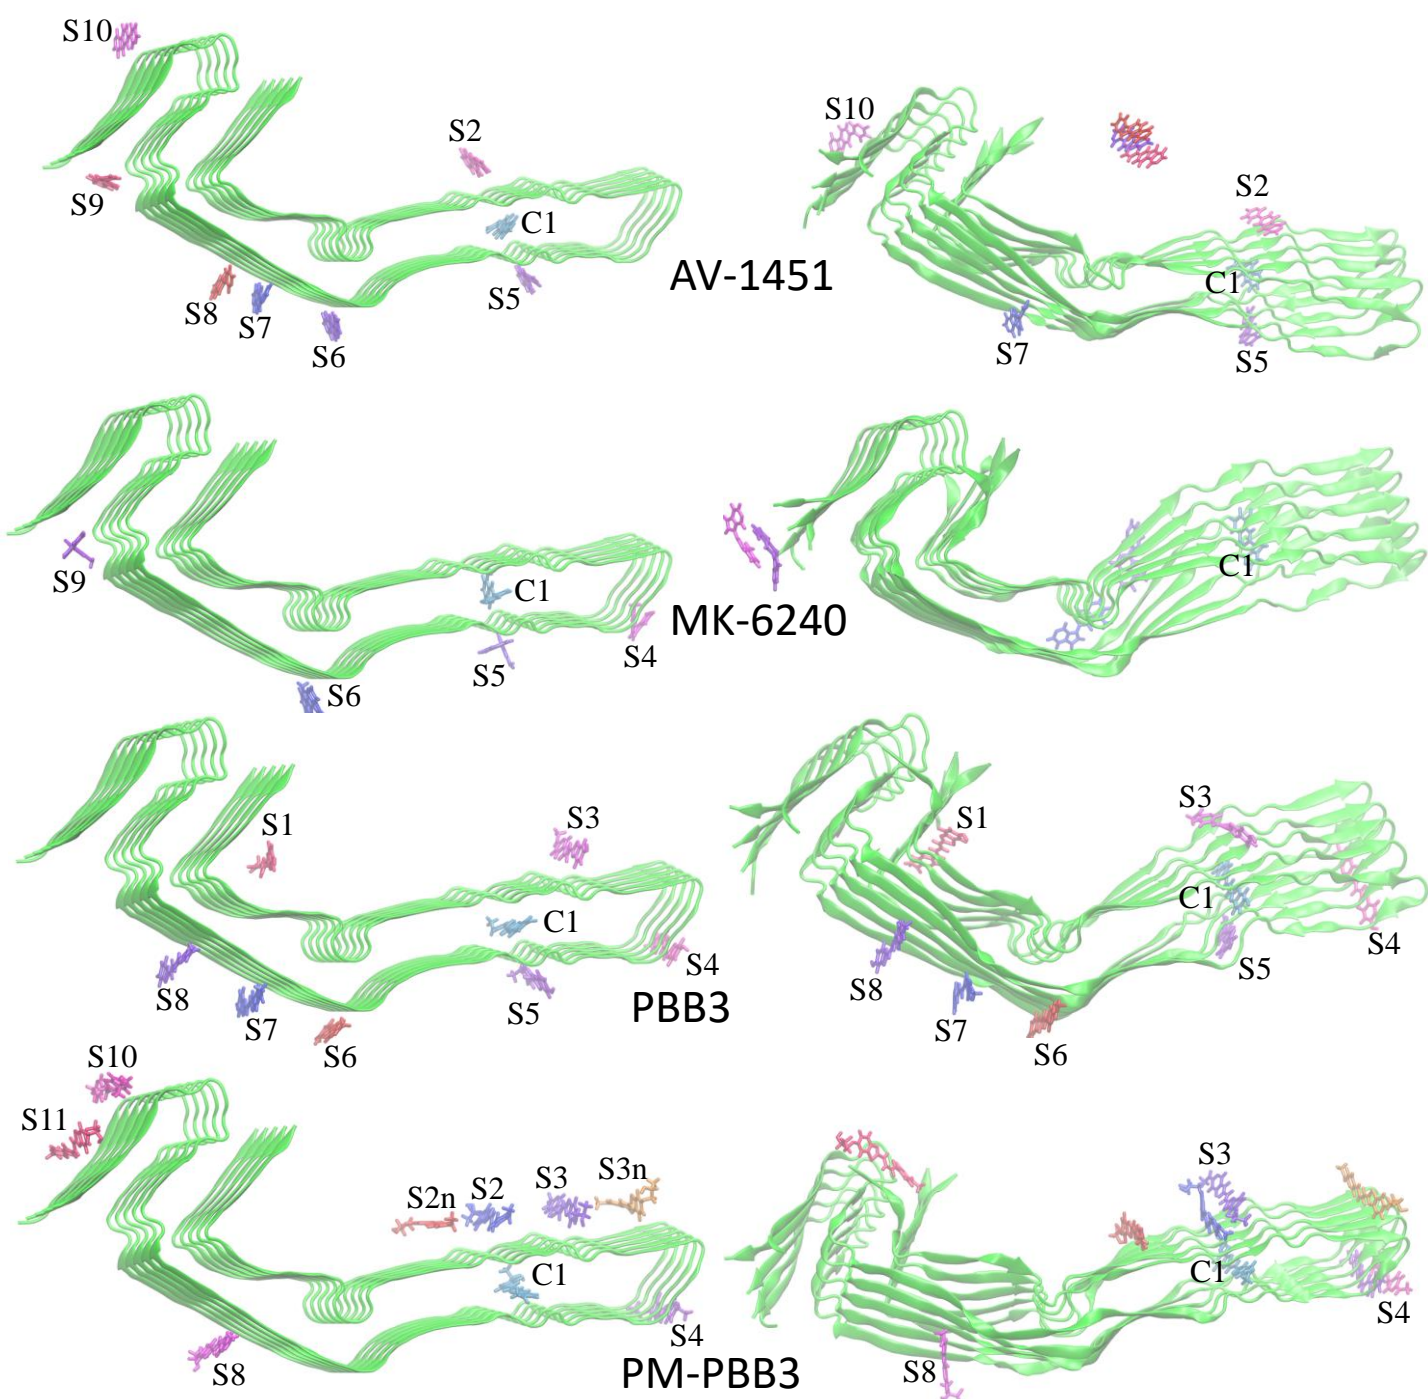

**Supplementary Figure S1** Initial PET probe-bound tau structures (left) and the structures after MD simulation (right). In the initial structures, all the possible binding sites are docked with PET probes, AV-1451, MK-6240, PBB3 and PM-PBB3.

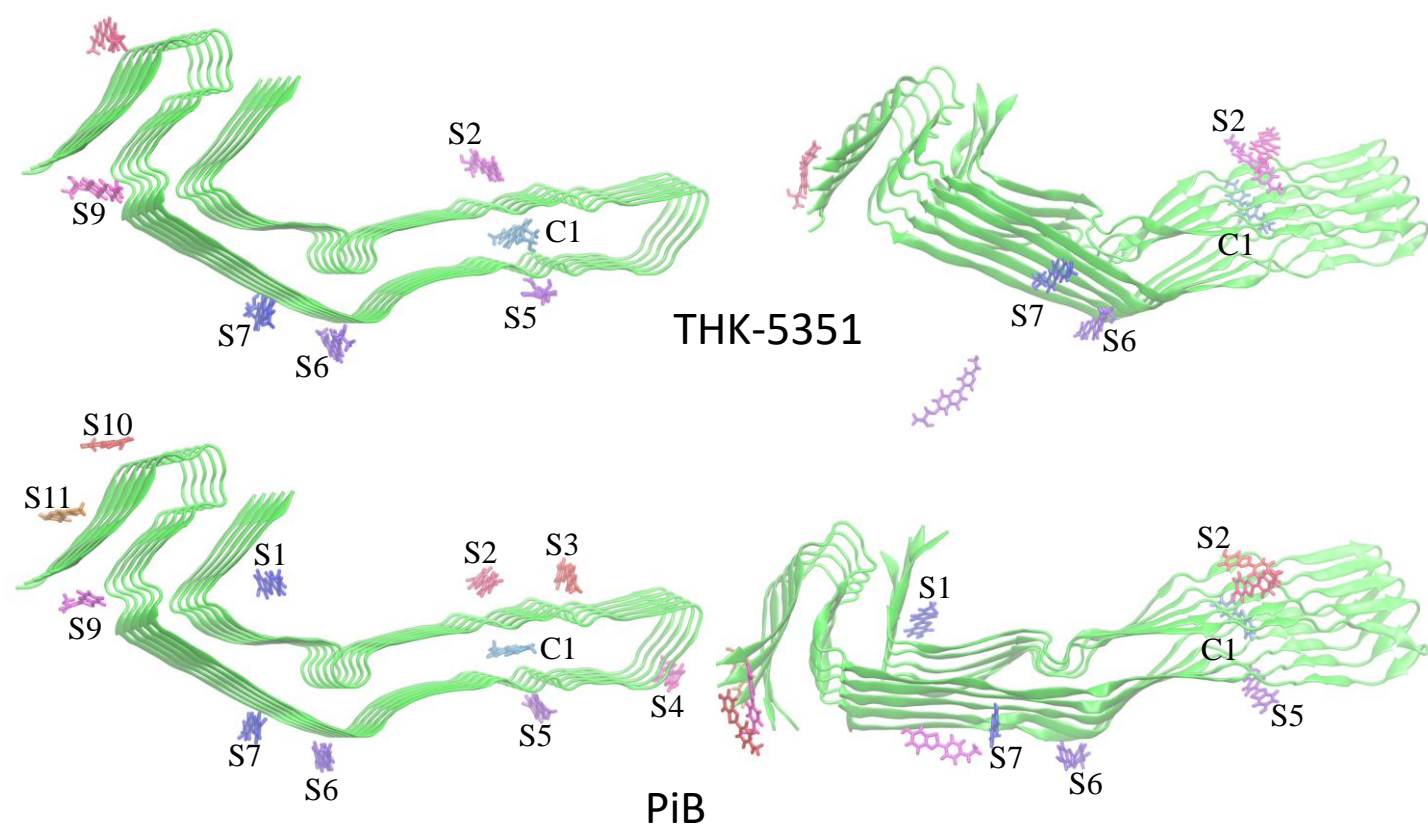

**Supplementary Figure S2** Initial PET probe-bound tau structures (left) and the structures after MD simulation (right). In the initial structures, all the possible binding sites are docked with PET probes, THK-5351 and PiB.

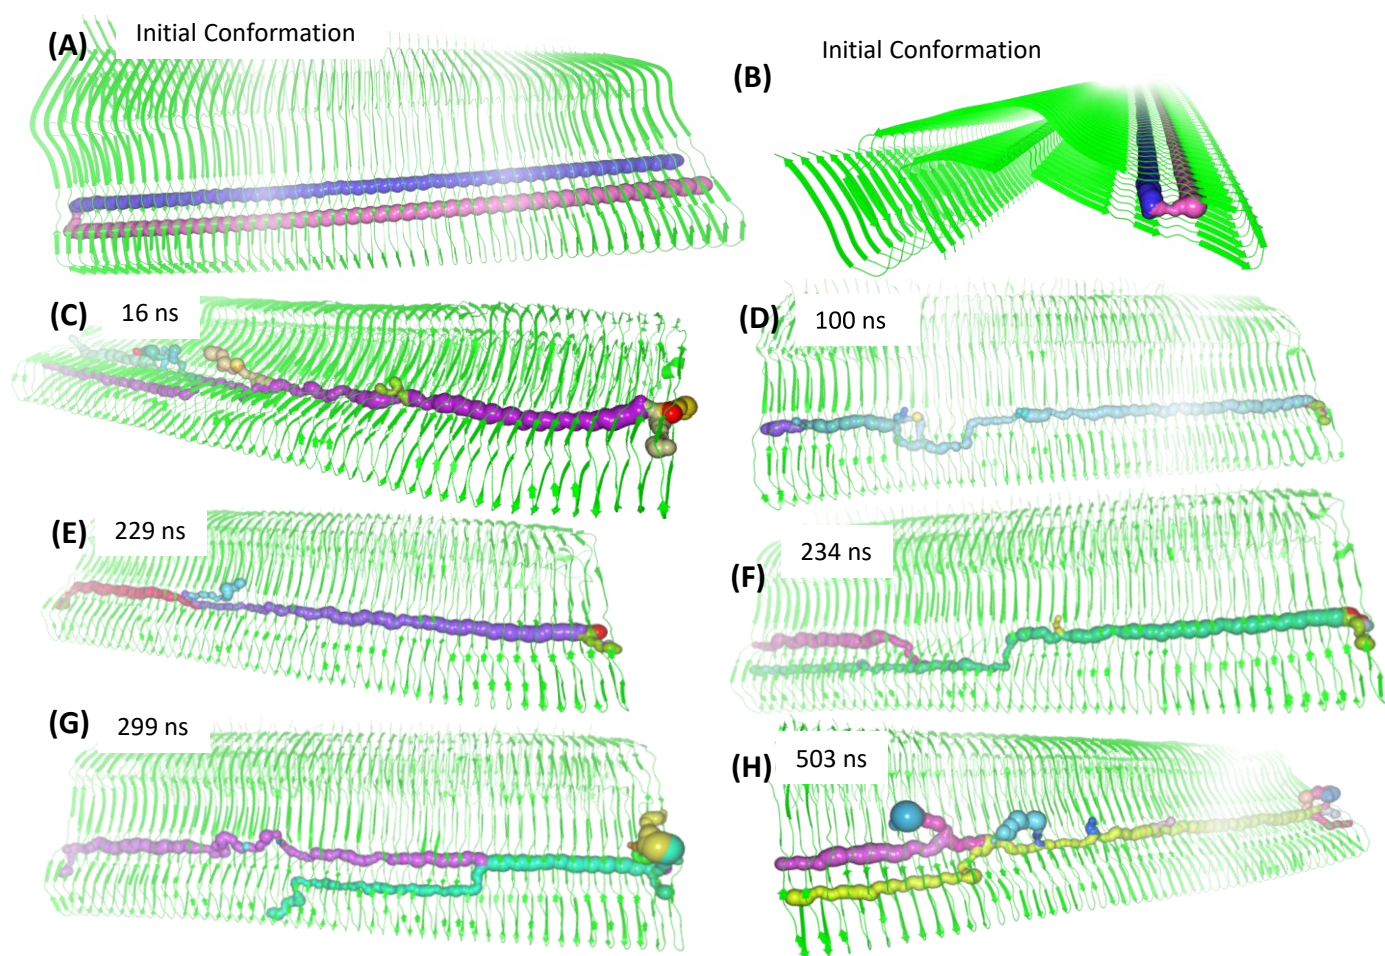

**Supplementary Figure S3** Tunnels calculated in the tau cryo-EM structure (A, B) and structure from MD simulation of the after (C) 16 ns, (D) 100 ns, (E) 229 ns, (F) 234 ns, (G) 299 ns, and (H) 503 nanoseconds.



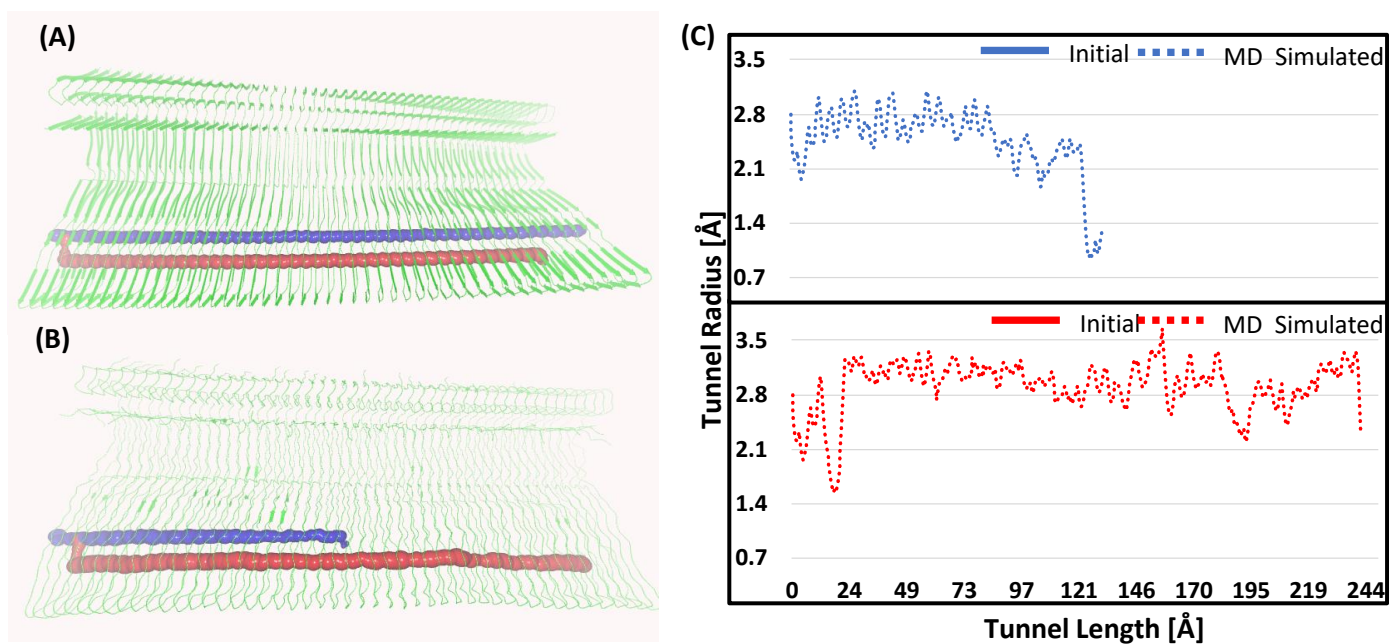

**Supplementary Figure S4** Tunnels predicted in tau assembly modeled using cryo-EM filaments at the beginning (A) and after (B) MD simulation. Predicted tunnels (blue and red) and their radius in initial (continuous line) and MD simulated (dotted line) structure.

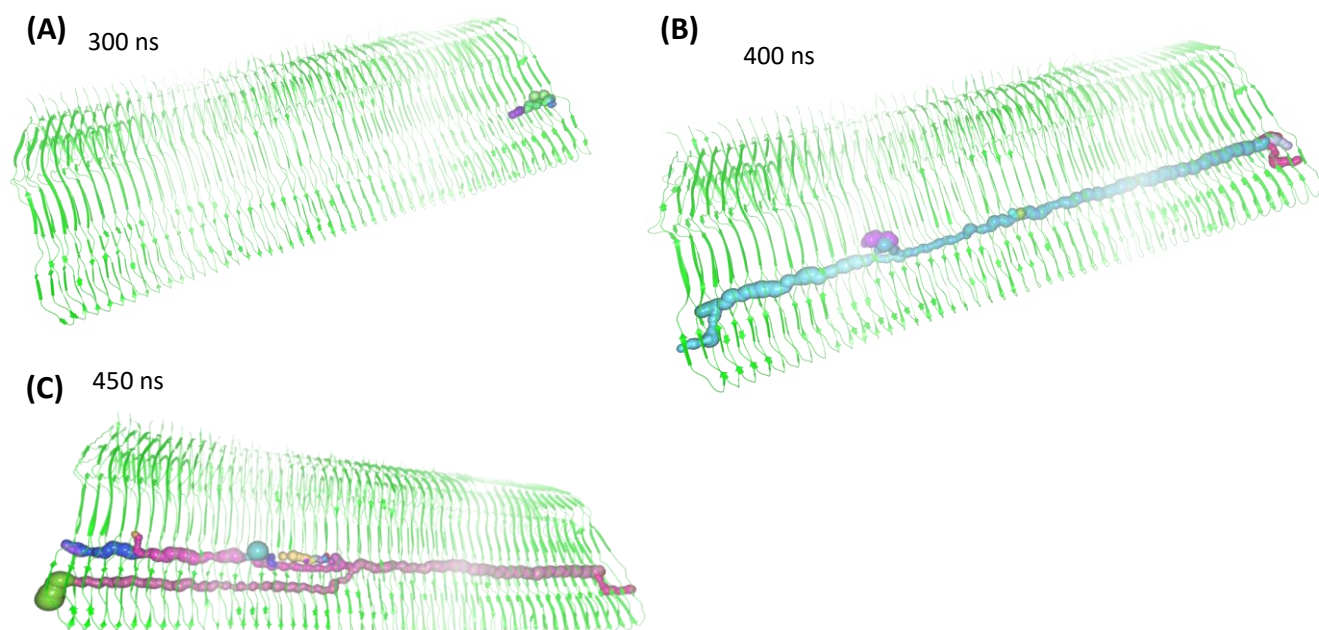

**Supplementary Figure S5** Tunnels calculated in the tau structure from MD simulation after (A) 300 ns, (B) 400 ns and (C) 450 nanoseconds.
